# Supplementary material for: Multiphoton absorption in low-dimensional cesium copper iodide single crystals
Source: Royal Society of Chemistry journal article supplement (doi:10.1039/d0tc04061d), 2020-01-01
Supplement: d0tc04061d1.pdf [file d0tc04061d1.pdf]

Electronic Supplementary Information ESI for:

## **Multiphoton Absorption in Low-Dimensional Cesium Copper Iodide Single Crystals**

Zhihang Guo,<sup>‡a,b,c</sup> Junzi Li,<sup>‡a,d</sup> Yang Gao,<sup>a</sup> Jiaji Cheng,<sup>a,c</sup> Wenjing Zhang,<sup>d</sup> Ruikun Pan,<sup>\*c</sup> Rui Chen,<sup>\*b</sup> and Tingchao He<sup>\*a</sup>

- a. College of Physics and Optoelectronic Engineering, Shenzhen University, Shenzhen 518060, China. E-mail: tche@szu.edu.cn
- b. Department of Electrical and Electronic Engineering, Southern University of Science and Technology, Shenzhen 518055, China. Email: chenr@sustech.edu.cn
- c. Key Laboratory of Green Preparation and Application for Functional Materials, Ministry of Education, School of Materials Science and Engineering, Hubei University, Wuhan 430062, China. Email: rkpan@hubu.edu.cn
- d. SZU-NUS Collaborative Innovation Center for Optoelectronic Science & Technology, International Collaborative Laboratory of 2D Materials for Optoelectronics Science and Technology of Ministry of Education, College of Physics and Optoelectronic Engineering, Shenzhen University, Shenzhen 518060, China

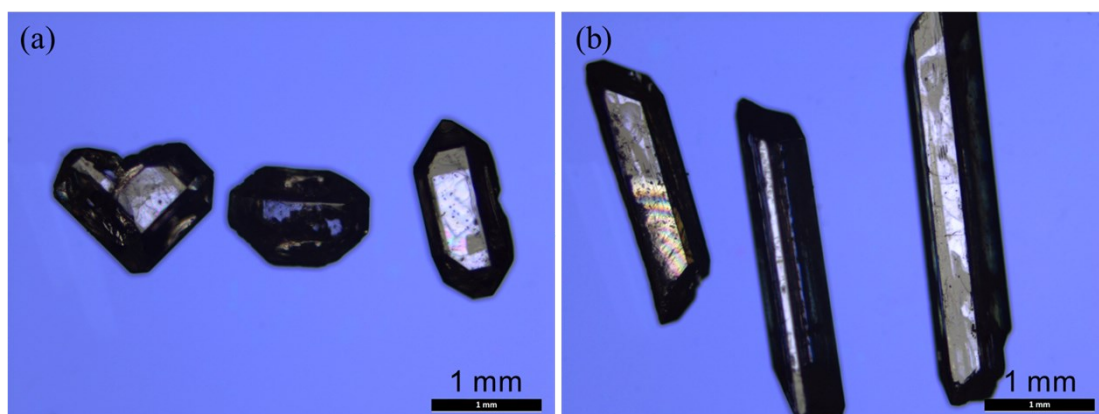

**Fig. S1** Optical microscopy images of a)  $\text{Cs}_3\text{Cu}_2\text{I}_5$  and b)  $\text{CsCu}_2\text{I}_3$  millimeter-level SCs.

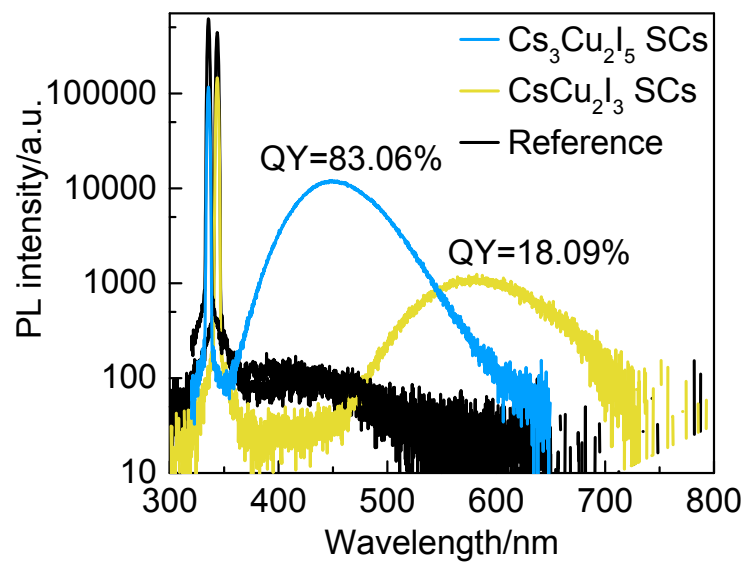

**Fig. S2** Absolute PLQY measurements of the  $\text{Cs}_3\text{Cu}_2\text{I}_5$  and  $\text{CsCu}_2\text{I}_3$  SCs.

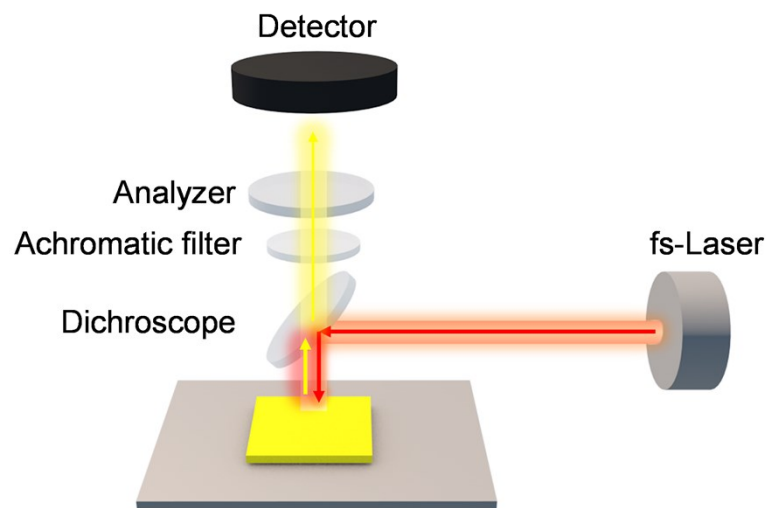

**Fig. S3** The measurement configuration for two- and three-photon excited PL spectra.

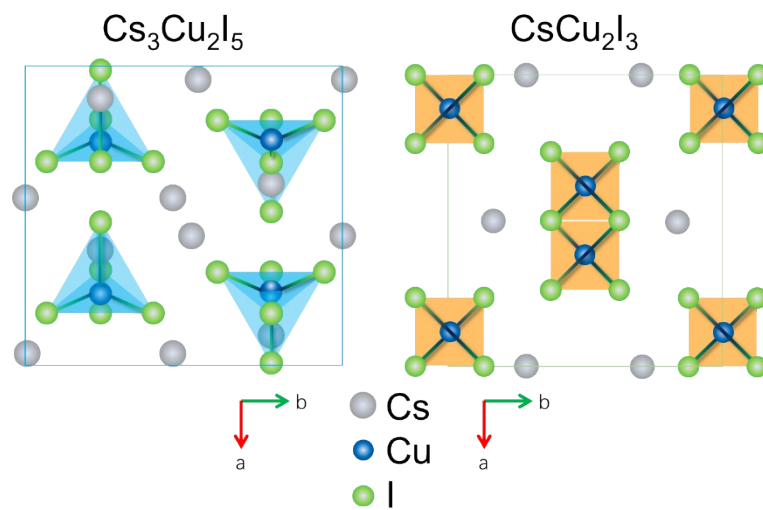

**Fig. S4** Top view of the crystal structures of the  $\text{Cs}_3\text{Cu}_2\text{I}_5$  and  $\text{CsCu}_2\text{I}_3$  SCs.

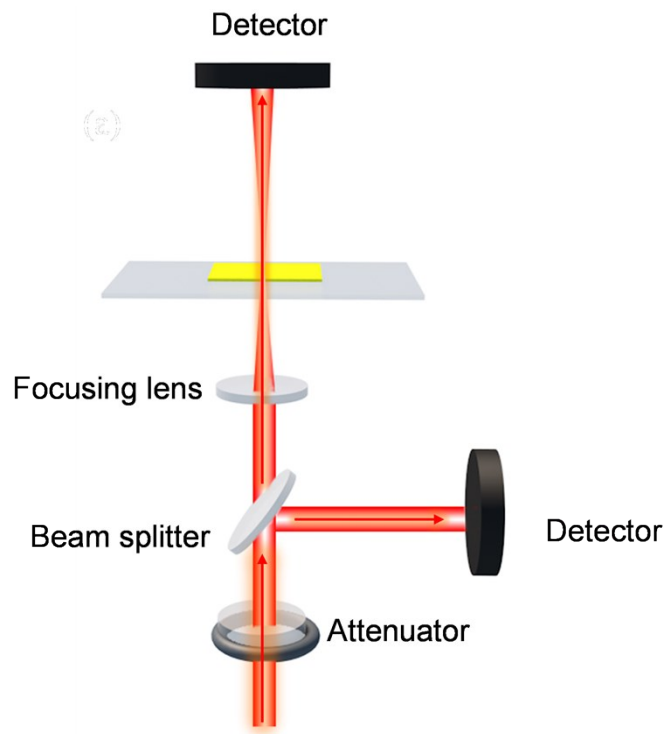

**Fig. S5** The schematic diagram for our home-built micro-area nonlinear optical characterization system.
